# Supplementary material for: Re-convolving the compositional landscape of primary and recurrent glioblastoma reveals prognostic and targetable tissue states
Source: PubMed Central journal article supplement (PMC10160047; doi:10.1038/s41467-023-38186-1), 2023-05-04
Supplement: 41467_2023_38186_MOESM3_ESM.pdf [file 41467_2023_38186_MOESM3_ESM.pdf]

## **Description of Additional Supplementary Information Files Document**

**Supplementary Dataset 1**-- Single Nucleus and Spatial Transcriptomics Sample Metadata.

**Supplementary Dataset 2**--Markers of Primary Glioma Subclusters.

**Supplementary Dataset 3**--Markers of Recurrent Glioma Subclusters.

**Supplementary Dataset 4**--Markers of Astrocyte Subclusters.

**Supplementary Dataset 5**--Markers of Myeloid Subclusters.

**Supplementary Dataset 6**--Differentially Expressed Genes with Cerulenin Treatment in Astrocytes and GBM Explants.

Sheet 1: Differential gene expression comparing astrocytes treated with cerulenin and DMSO. Sheet 2: Differential gene expression comparing IDH-WT GBM explants treated with cerulenin and DMSO. Sheet 3: KEGG Pathway enrichment for differentially expressed genes in cerulenin treated astrocytes.

**Supplementary Dataset 7**--Gene Signatures associated with Tissue States.

**Supplementary Dataset 8**--Astrocyte Glioma Co-Culture Experiments.
